# Supplementary material
Source: publisher figshare collection journal article supplement (https://gsapubs.figshare.com/ndownloader/files/22745291)
Supplement: Supplementary file 1 [file 22745291]

## DATA REPOSITORY ITEM DR-1, U-PB SHRIMP-RG ANALYTICAL DATA:

### U-Pb SHRIMP-RG Analytical Procedures

U-Pb analyses were performed at the Stanford - U.S.G.S. Micro Analytical Center (SUMAC). Zircon grains were prepared at Stanford University using standard mineral separation techniques, including, Frantz magnetic and heavy liquid separations. Separated zircons were handpicked under a binocular microscope to ensure purity and freedom from cracks, inclusions, or obvious alteration. The selected grains were mounted in epoxy with the laboratory standard R33 (419 Ma) and polished with diamond compound to expose the mid-points of the crystals. Polished grain mounts were imaged in reflected light with an optical microscope, gold-coated, and imaged in cathodoluminescence (CL) mode with a JEOL 5600 scanning electron microscope (SEM).

The SHRIMP-RG ion microprobe at SUMAC was operated with an  $O_2^-$  primary ion beam varying from 4 to 6 nA, which produced a spot with a diameter of  $\sim 20\text{--}30\text{ }\mu\text{m}$  and a depth of  $1\text{--}2\text{ }\mu\text{m}$  on the target zircons. Eleven peaks were measured sequentially for 10 min with an ETP electron multiplier ( $Zr_2O$ ,  $^{204}Pb$ ,  $^{206}Pb$ ,  $^{207}Pb$ ,  $^{208}Pb$ ,  $^{238}U$ ,  $ThO$ ,  $UO$ ,  $ErO$ ,  $YbO$ , and  $HfO$ ). Data was reduced following the methods described by Ireland and Williams (2003), using the SQUID and IsoPlot programs of Ludwig (2001, 2003).

### References

- Ireland, T.R. and Williams, I.S., 2003, Considerations in zircon geochronology by SIMS: Reviews in Mineralogy and Geochemistry, v. 53, p. 215-241.  
 Ludwig, K.R., 2001, Eliminating mass-fractionation effects on U-Pb isochron ages without double spiking: *Geochimica et Cosmochimica Acta*, v. 65, n. 18, p. 3139-3145.  
 Ludwig, K.R., 2003, IsoPlot 3.00: Special Publication 4, Berkeley Geochronology Center, Berkeley, California.

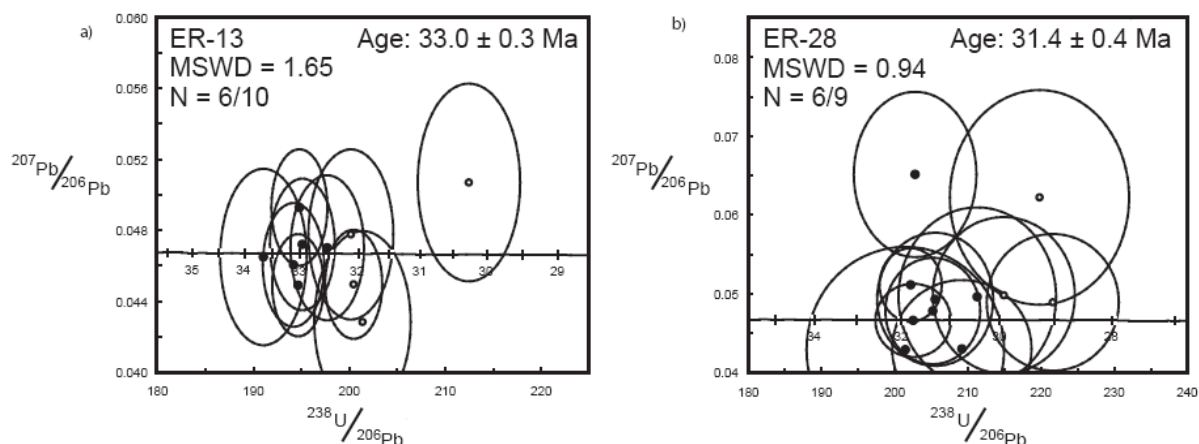

Figure DR-1. Tera - Wasserburg plots of SHRIMP-RG U-Pb data from a) ER-13 (diorite) and b) ER-28 (quartz monzonite). These phases crop out across Granite Mountain and comprise the rocks sampled for thermochronology. Filled circles represent data used to determine age ( $2\sigma$ ). Open circles are data not included in the age calculation because they do not fall within  $2\sigma$  of the calculated mean age.

Table DR-1: U-Pb isotopic data for ER-28 (quartz monzonite) and ER-13 (diorite) at Granite Mountain, East Range.

| Spot Name        | core/<br>rim | comm 206<br>* (%) | U<br>(ppm) | Th<br>(ppm) | 232Th/<br>238U | 207corr<br>206Pb/238U<br>Age (Ma) | 1 $\sigma$<br>err<br>(Ma) | Total<br>238/206 | err<br>(%) | Total<br>207/206 | err<br>(%) | 207r/235 | err<br>(%) | 206r/238 | err<br>(%) | err corr |
|------------------|--------------|-------------------|------------|-------------|----------------|-----------------------------------|---------------------------|------------------|------------|------------------|------------|----------|------------|----------|------------|----------|
| <b>ER28-1.1</b>  | rim          | -0.46             | 299        | 152         | 0.52           | <b>30.9</b>                       | <b>0.6</b>                | 209.19           | 1.9        | 0.0430           | 8.3        | 0.02     | 21.9       | 0.0047   | 2.0        | 0.092    |
| <b>ER28-2.1</b>  | rim          | 0.33              | 381        | 235         | 0.64           | <b>31.2</b>                       | <b>0.5</b>                | 205.55           | 1.6        | 0.0493           | 7.0        | 0.02     | 24.8       | 0.0048   | 1.8        | 0.074    |
| <b>ER28-3.1</b>  | rim          | 0.40              | 328        | 180         | 0.57           | <b>29.8</b>                       | <b>0.6</b>                | 214.93           | 1.8        | 0.0498           | 8.2        | 0.02     | 50.3       | 0.0045   | 2.5        | 0.049    |
| <b>ER28-4.1</b>  | rim          | 1.98              | 220        | 114         | 0.53           | <b>28.7</b>                       | <b>0.7</b>                | 219.80           | 2.3        | 0.0622           | 8.9        | 0.02     | 63.9       | 0.0044   | 3.1        | 0.048    |
| <b>ER28-5.1</b>  | rim          | 0.29              | 419        | 262         | 0.65           | <b>28.9</b>                       | <b>0.5</b>                | 221.62           | 1.7        | 0.0489           | 7.3        | 0.02     | 49.8       | 0.0044   | 2.2        | 0.044    |
| <b>ER28-5.2</b>  | core         | -0.01             | 1007       | 747         | 0.77           | <b>31.8</b>                       | <b>0.3</b>                | 202.53           | 1.0        | 0.0466           | 4.1        | 0.03     | 6.9        | 0.0049   | 1.1        | 0.156    |
| <b>ER28-6.1</b>  | rim          | 0.38              | 246        | 126         | 0.53           | <b>30.3</b>                       | <b>0.7</b>                | 211.29           | 2.1        | 0.0496           | 9.3        | 0.03     | 9.6        | 0.0047   | 2.1        | 0.217    |
| <b>ER28-7.1</b>  | rim          | 0.56              | 1213       | 952         | 0.81           | <b>31.6</b>                       | <b>0.3</b>                | 202.19           | 0.9        | 0.0511           | 3.7        | 0.03     | 3.8        | 0.0049   | 0.9        | 0.225    |
| <b>ER28-7.2</b>  | core         | -0.48             | 125        | 103         | 0.85           | <b>32.1</b>                       | <b>0.9</b>                | 201.46           | 2.7        | 0.0429           | 12.4       | 0.03     | 6.9        | 0.0047   | 4.6        | 0.156    |
| <b>ER28-7.3</b>  | rim          | 2.34              | 309        | 170         | 0.57           | <b>31.0</b>                       | <b>0.5</b>                | 202.80           | 1.7        | 0.0651           | 6.6        | 0.03     | 29.3       | 0.0048   | 2.2        | 0.074    |
| <b>ER28-8.1</b>  | rim          | 0.15              | 542        | 282         | 0.54           | <b>31.3</b>                       | <b>0.4</b>                | 205.21           | 1.3        | 0.0478           | 5.8        | 0.03     | 5.9        | 0.0049   | 1.3        | 0.218    |
| <b>ER13-1.1</b>  | rim          | 0.14              | 1103       | 965         | 0.90           | <b>32.1</b>                       | <b>0.3</b>                | 200.16           | 0.9        | 0.0478           | 4.1        | 0.03     | 7.6        | 0.0050   | 1.0        | 0.125    |
| <b>ER13-2.1</b>  | rim          | 0.07              | 1693       | 1488        | 0.91           | <b>32.9</b>                       | <b>0.2</b>                | 195.11           | 0.7        | 0.0472           | 3.2        | 0.03     | 6.7        | 0.0051   | 0.8        | 0.114    |
| <b>ER13-3.1</b>  | rim          | -0.49             | 817        | 709         | 0.90           | <b>32.1</b>                       | <b>0.3</b>                | 201.38           | 1.0        | 0.0428           | 4.9        | 0.03     | 5.0        | 0.0050   | 1.0        | 0.204    |
| <b>ER13-4.1</b>  | rim          | 0.04              | 1263       | 1204        | 0.99           | <b>32.5</b>                       | <b>0.3</b>                | 197.70           | 0.8        | 0.0470           | 3.6        | 0.03     | 5.4        | 0.0050   | 0.8        | 0.151    |
| <b>ER13-5.1</b>  | rim          | -0.22             | 2471       | 1663        | 0.70           | <b>32.1</b>                       | <b>0.2</b>                | 200.45           | 0.6        | 0.0449           | 2.8        | 0.03     | 3.4        | 0.0050   | 0.6        | 0.180    |
| <b>ER13-6.1</b>  | core         | -0.08             | 1826       | 976         | 0.55           | <b>33.1</b>                       | <b>0.2</b>                | 194.19           | 0.7        | 0.0460           | 3.1        | 0.03     | 3.2        | 0.0051   | 0.7        | 0.213    |
| <b>ER13-7.1</b>  | rim          | -0.23             | 2683       | 2800        | 1.08           | <b>33.1</b>                       | <b>0.2</b>                | 194.66           | 0.6        | 0.0449           | 2.6        | 0.03     | 2.7        | 0.0051   | 0.6        | 0.211    |
| <b>ER13-8.1</b>  | rim          | 0.33              | 2297       | 816         | 0.37           | <b>32.9</b>                       | <b>0.2</b>                | 194.79           | 0.6        | 0.0493           | 2.7        | 0.03     | 3.5        | 0.0051   | 0.6        | 0.176    |
| <b>ER13-9.1</b>  | rim          | -0.03             | 912        | 766         | 0.87           | <b>33.7</b>                       | <b>0.3</b>                | 191.05           | 1.0        | 0.0465           | 4.4        | 0.03     | 6.5        | 0.0052   | 1.0        | 0.152    |
| <b>ER13-10.1</b> | rim          | 0.51              | 800        | 677         | 0.87           | <b>30.1</b>                       | <b>0.3</b>                | 212.46           | 1.0        | 0.0507           | 4.5        | 0.03     | 9.4        | 0.0047   | 1.1        | 0.118    |

## DATA REPOSITORY ITEM DR-2, Fission Track Analytical Data

### Fission Track Analytical Procedures

All samples were prepared and analyzed at Stanford University. Apatite concentrates were prepared using standard mineral separation techniques, including crushing, grinding, Frantz magnetic separation, and heavy liquids. All samples were rinsed ultrasonically with acetone and deionized water to remove surface contaminants. Apatite grains were mounted in epoxy on glass slides and ground and polished by hand. Polished grain-mounts were etched for 20 s in 5N nitric acid at room temperature and affixed to muscovite external detectors. Samples and external detectors were stacked single-file in plastic reactor cans and irradiated in well thermalized positions of the Oregon State University TRIGA reactor. CN5 dosimetry glasses with muscovite external detectors were used as neutron flux monitors (3 per can). After irradiation, external detectors were etched in 48% HF.

Tracks were counted by J. Colgan with a Zeiss Axioskop microscope with a 100x air objective, 1.25x tube factor, 10x eyepieces, and transmitted light with supplementary reflected light as needed. External detector prints were located with Kinetek automated scanning stage (Dumitru, 1993). Only grains with c axes subparallel to the slide plane were dated. Ages calculated using zeta calibration factor of 367.6 (e.g, Hurford and Green, 1983). Ages reported are the fission-track central age of Galbraith and Laslett (1993). Confined track lengths were measured only in apatite grains with c axes subparallel to slide plane; only horizontal tracks were measured (within  $\pm 5\text{--}10^\circ$ ), following protocols of Laslett et al. (1982). Lengths were measured with computer digitizing tablet and drawing tube, calibrated against a stage micrometer (Dumitru, 1993). Confined track lengths were measured along with angles of tracks to the grains' c-axes and the Dpar track entrance diameter, following the protocols of Ketcham et al., 1999. Confined tracks hosted by surface tracks and by cleavage surfaces were both measured. Age calculations were done with an Excel® program by J. Colgan. Length models were generated using the HeFTy® program by Ketcham (2005). Model runs assume that AFT ages are drawn from a single kinetic population and that chemical zoning is absent.

### References

- Dumitru, T.A., 1993, A new computer-automated microscope stage system for fission track analysis: *Nuclear Tracks and Radiation Measurements*, v. 21, p. 575-580.
- Galbraith, R.F., and Laslett, G.M., 1993, Statistical models for mixed fission-track ages: *Nuclear Tracks and Radiation Measurements*, v. 21, p.459-470.
- Hurford, A.J., Green, P.F., 1983, The zeta age calibration of fission-track: *Chemical Geology*, v. 41, n. 4, p. 285-317.
- Ketcham, R.A. Donelick, R.A. Carlson, W.D., 1999, Variability of apatite fission-track annealing kinetics; III, Extrapolation to geological time scales: *American Mineralogist*, v. 84, n. 9, p. 1235-1255.
- Ketcham, R.A., 2005, Forward and inverse modeling of low-temperature thermochronometry data: *Reviews in Mineralogy and Geochemistry*, v. 58, n. 1, p. 275-314.
- Laslett, G.M., Kendall, W.S., Gleadow, A.J.W., Duddy, I.R., 1982, Bias in measurement of fission-track length distributions: *Nuclear Tracks and Radiation Measurements*, v. 6, n. 2-3, p. 79-85.

Figure DR-2. Fission track length data

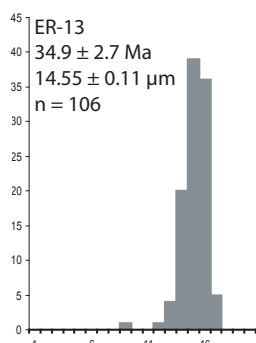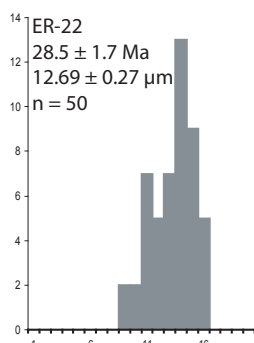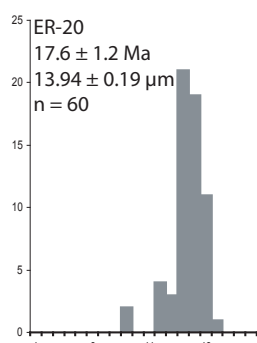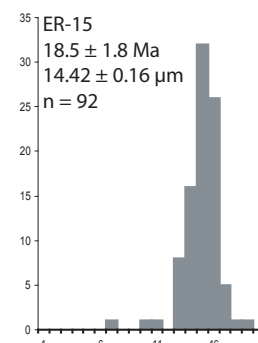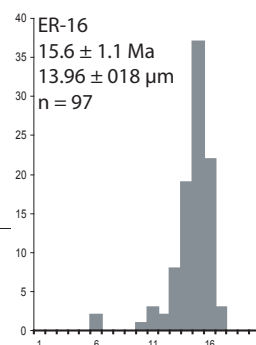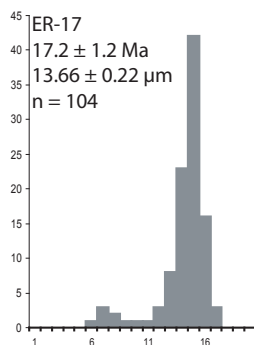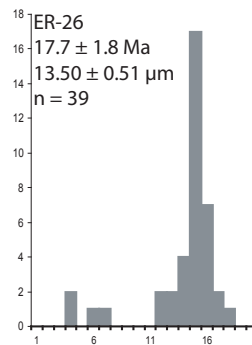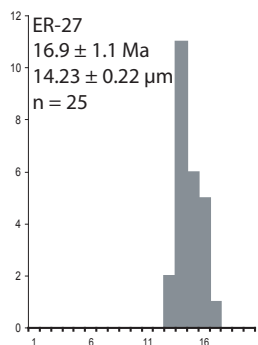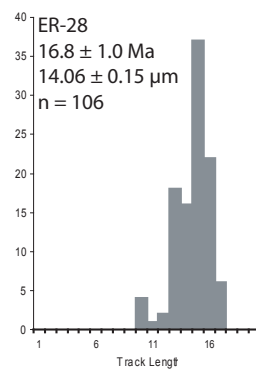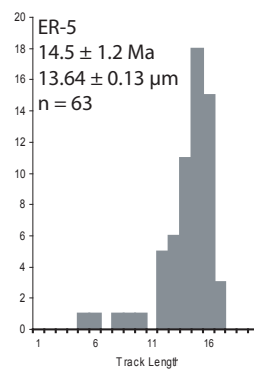

## KEY TO LENGTH DATA

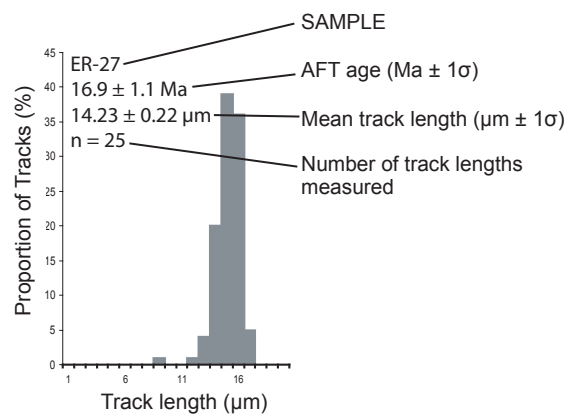

## DATA REPOSITORY ITEM DR-3, Apatite (U-Th)/He Analytical Data

### Apatite (U-Th)/He Analytical Procedures

Apatite crystals were separated at Stanford University from crushed samples using standard heavy liquid separation techniques. Apatite (U-Th)/He analyses were performed at Stanford University by Ar laser heating for He extraction and at UC Santa Cruz by sector ICP-MS for U and Th determinations following methods of Metcalf (2006).

Euhedral and inclusion-free grains were selected by hand and carefully inspected under high power (112.5X) stereo-zoom with cross-polarization for screening inclusions. Single grains (2 per sample) were photographed and measured in two different orientations before they were individually inserted into 1 mm Pt foil tubes, which were then loaded into individual wells within a copper pan and placed in a laser cell connected to the He extraction line by high-vacuum flexhose. The laser cell was pumped down to  $10^{-8}$  torr and individual samples were heated with an Argon laser for 3 minutes at 1–5 W. Temperatures of heated foil packets were not measured but are estimated at about 1000 °C based on experiments relating luminosity and stepwise degassing of apatite.  $^4\text{He}$  blanks ( $\sim 0.05$  fmol  $^4\text{He}$ ) were determined without sample heating using the same procedures.

Helium gas liberated from samples was processed by: 1) spiking with  $\sim 4$  pmol of  $^3\text{He}$ , 2) cryogenic concentration at 10K on a charcoal trap and purification by release at 38K, and 3) measurement of  $^4\text{He}/^3\text{He}$  ratios on a Pfeiffer Vacuum™ Prisma quadrupole mass spectrometer. All ratios were referenced to multiple same-day measured ratios and known volumes of  $^4\text{He}$  standards processed in the same way. After degassing, samples were retrieved from the laser cell, spiked with 40 ppb calibrated  $^{229}\text{Th}$  and  $^{233}\text{U}$  solution, and dissolved *in-situ* from Pt tubes in  $\sim 70\%$   $\text{HNO}_3$  in teflon vials and heated to 85°C for 2 hours. Each batch of samples was prepared with a series of acid blanks and spiked blanks to check the purity and calibration of the reagents and spikes. Spiked solutions were analyzed as  $\sim 0.5$  mL of  $\sim 5$ –20 ppm U-Th solutions by isotope dilution on a Finnigan MAT Element ICP-MS at UC Santa Cruz.

Age calculations were done with an Excel® program by J. Metcalf that applies an alpha-ejection correction to derive final (U-Th)/He ages that account for diffusion-domain-dependent loss of the daughter nuclide (after Farley et al., 1996 and Farley, 2002). Replicate analyses of Durango apatite during the period of these analyses yielded an age of  $31.37 \pm 2.35$  (1 $\sigma$ ,  $n = 4$ ). On the basis of these and other laboratory standards, we estimate 7% uncertainty on expected ages. (U-Th)/He age models were generated using the HeFTy® program after Ketcham (2005). The Ketcham and others (1999) AFT annealing calibration and Farley (2000) (U-Th)/He diffusion calibration are used.

### References

- Farley, K.A., 2002, (U-Th)/He dating; techniques, calibrations, and applications: Reviews in Mineralogy and Geochemistry, v. 47, p. 819-843.
- Farley, K.A., Wolf, R.A., Silver, L.T., 1996, The effects of long alpha-stopping distances on (U-Th)/He ages: Geochim Cosmochim Acta, v. 60 p. 4223-4229.
- Ketcham, R.A., 2005, Forward and inverse modeling of low-temperature thermochronometry data: Reviews in Mineralogy and Geochemistry, v. 58, n. 1, p. 275-314.
- Metcalf, J.R., 2006, Constraining continental deformation with the apatite (U-Th)/He thermochronometer: Ph.D. Dissertation, Stanford University.

Table DR-2. Apatite (U-Th)/He analytical data

| Sample      | Age $\pm 1\sigma$ (Ma) | Weighted Age<br>$\pm 1\sigma$ (Ma) | [U] (ppm) | [Th] (ppm) | U/Th | [ <sup>4</sup> He] (nmol/g) | F <sub>t</sub> ** |
|-------------|------------------------|------------------------------------|-----------|------------|------|-----------------------------|-------------------|
| <b>ER5</b>  | 10.6 $\pm$ 1.3         | <b>10.2 <math>\pm</math> 0.4</b>   | 44.06     | 63.82      | 0.69 | 2.35                        | 0.63              |
|             | 9.2 $\pm$ 0.5          |                                    | 27.14     | 79.94      | 0.34 | 1.76                        | 0.69              |
|             | 13.1 $\pm$ 1.4         |                                    | 22.14     | 65.40      | 0.34 | 1.87                        | 0.64              |
|             | 11.2 $\pm$ 0.8         |                                    | 26.81     | 72.76      | 0.37 | 1.91                        | 0.65              |
| <b>ER4</b>  | 11.5 $\pm$ 0.7         | <b>10.9 <math>\pm</math> 0.4</b>   | 18.29     | 56.46      | 0.32 | 1.72                        | 0.80              |
|             | 10.6 $\pm$ 0.6         |                                    | 16.81     | 51.28      | 0.33 | 1.41                        | 0.77              |
| <b>ER3</b>  | 12.7 $\pm$ 0.6         | <b>11.9 <math>\pm</math> 0.3</b>   | 27.70     | 78.21      | 0.35 | 2.28                        | 0.65              |
|             | 11.9 $\pm$ 0.6         |                                    | 20.68     | 62.32      | 0.33 | 1.77                        | 0.70              |
|             | 11.7 $\pm$ 0.8         |                                    | 20.56     | 56.04      | 0.37 | 1.57                        | 0.67              |
|             | 11.3 $\pm$ 0.6         |                                    | 20.70     | 69.45      | 0.30 | 1.78                        | 0.71              |
| <b>ER28</b> | 12.3 $\pm$ 0.7         | <b>11.8 <math>\pm</math> 0.5</b>   | 37.51     | 96.78      | 0.39 | 2.73                        | 0.62              |
|             | 10.5 $\pm$ 1.2         |                                    | 16.35     | 38.61      | 0.42 | 1.04                        | 0.65              |
|             | 11.7 $\pm$ 1.1         |                                    | 26.14     | 72.37      | 0.36 | 1.84                        | 0.61              |
| <b>ER27</b> | 13.5 $\pm$ 0.7         | <b>13.1 <math>\pm</math> 0.4</b>   | 18.03     | 58.04      | 0.31 | 1.86                        | 0.73              |
|             | 13.1 $\pm$ 0.6         |                                    | 21.84     | 64.65      | 0.34 | 2.15                        | 0.75              |
|             | 12.8 $\pm$ 0.7         |                                    | 22.19     | 70.07      | 0.32 | 2.06                        | 0.70              |
| <b>ER26</b> | 12.7 $\pm$ 0.7         | <b>12.4 <math>\pm</math> 0.5</b>   | 19.40     | 59.15      | 0.33 | 1.77                        | 0.70              |
|             | 12.1 $\pm$ 1.0         |                                    | 19.39     | 55.13      | 0.35 | 1.60                        | 0.68              |
|             | 11.8 $\pm$ 0.8         |                                    | 23.61     | 68.76      | 0.34 | 1.87                        | 0.67              |
|             | 13.6 $\pm$ 1.4         |                                    | 18.77     | 58.86      | 0.32 | 1.77                        | 0.66              |
| <b>ER18</b> | 14.5 $\pm$ 1.3         | <b>14.6 <math>\pm</math> 0.7</b>   | 29.23     | 90.45      | 0.32 | 2.66                        | 0.61              |
|             | 14.6 $\pm$ 1.2         |                                    | 24.68     | 80.88      | 0.31 | 2.72                        | 0.71              |
|             | 14.6 $\pm$ 1.1         |                                    | 25.50     | 83.55      | 0.31 | 2.52                        | 0.64              |
| <b>ER17</b> | 15.7 $\pm$ 0.7         | <b>15.6 <math>\pm</math> 0.5</b>   | 34.45     | 111.13     | 0.31 | 3.69                        | 0.65              |
|             | 15.3 $\pm$ 0.7         |                                    | 26.46     | 86.33      | 0.31 | 2.78                        | 0.65              |
|             | 17.8 $\pm$ 1.9         |                                    | 24.82     | 75.23      | 0.33 | 2.75                        | 0.61              |
| <b>ER16</b> | 15.5 $\pm$ 0.9         | <b>14.6 <math>\pm</math> 0.4</b>   | 22.79     | 71.19      | 0.32 | 2.49                        | 0.68              |
|             | 15.1 $\pm$ 0.6         |                                    | 21.93     | 76.27      | 0.29 | 2.59                        | 0.72              |
|             | 14.6 $\pm$ 0.8         |                                    | 25.65     | 90.26      | 0.28 | 2.90                        | 0.71              |
|             | 13.0 $\pm$ 0.8         |                                    | 15.56     | 45.74      | 0.34 | 1.44                        | 0.71              |
| <b>ER15</b> | 16.9 $\pm$ 1.9         | <b>15.9 <math>\pm</math> 1.1</b>   | 34.32     | 52.59      | 0.65 | 2.92                        | 0.62              |
|             | 15.4 $\pm$ 1.3         |                                    | 36.04     | 37.56      | 0.96 | 2.77                        | 0.67              |
| <b>ER20</b> | 13.8 $\pm$ 1.3         | <b>14.7 <math>\pm</math> 0.7</b>   | 25.78     | 120.56     | 0.21 | 3.24                        | 0.72              |
|             | 16.4 $\pm$ 1.3         |                                    | 36.18     | 194.79     | 0.19 | 5.58                        | 0.69              |
|             | 14.1 $\pm$ 1.2         |                                    | 26.30     | 117.82     | 0.22 | 3.30                        | 0.73              |
| <b>ER21</b> | 15.4 $\pm$ 0.7         | <b>14.5 <math>\pm</math> 0.5</b>   | 30.96     | 83.18      | 0.37 | 3.22                        | 0.69              |
|             | 13.3 $\pm$ 1.3         |                                    | 20.44     | 55.95      | 0.37 | 1.77                        | 0.66              |
|             | 15.7 $\pm$ 1.3         |                                    | 23.77     | 87.94      | 0.27 | 2.65                        | 0.63              |
|             | 13.2 $\pm$ 0.9         |                                    | 14.46     | 44.02      | 0.33 | 1.39                        | 0.71              |

Table DR-2 (continued). Apatite (U-Th)/He analytical data

| Sample      | Age $\pm 1\sigma$ (Ma) | Weighted Age<br>$\pm 1\sigma$ (Ma) | [U] (ppm) | [Th] (ppm) | U/Th | [ <sup>4</sup> He] (nmol/g) | F <sub>t</sub> ** |
|-------------|------------------------|------------------------------------|-----------|------------|------|-----------------------------|-------------------|
| <b>ER22</b> | 17.0 $\pm$ 1.3         |                                    | 54.09     | 269.63     | 0.20 | 8.04                        | 0.68              |
|             | 15.4 $\pm$ 0.8         |                                    | 29.26     | 139.97     | 0.21 | 4.01                        | 0.70              |
|             | 14.3 $\pm$ 1.0         |                                    | 28.75     | 134.39     | 0.21 | 3.34                        | 0.65              |
| <b>ER23</b> | 15.2 $\pm$ 1.2         | <b>14.9 <math>\pm</math> 0.6</b>   | 43.10     | 185.80     | 0.23 | 5.05                        | 0.64              |
|             | 15.2 $\pm$ 1.2         |                                    | 34.87     | 158.94     | 0.22 | 4.31                        | 0.66              |
|             | 14.4 $\pm$ 0.9         |                                    | 47.43     | 200.35     | 0.24 | 5.28                        | 0.65              |
| <b>ER24</b> | 14.0 $\pm$ 0.9         | <b>15.3 <math>\pm</math> 0.5</b>   | 58.86     | 170.96     | 0.34 | 6.58                        | 0.79              |
|             | 16.6 $\pm$ 0.9         |                                    | 93.00     | 292.25     | 0.32 | 10.57                       | 0.66              |
|             | 15.2 $\pm$ 0.9         |                                    | 81.90     | 240.07     | 0.34 | 8.78                        | 0.70              |
| <b>ER25</b> | 16.8 $\pm$ 1.4         | <b>16.5 <math>\pm</math> 0.5</b>   | 17.04     | 34.17      | 0.50 | 1.80                        | 0.71              |
|             | 16.1 $\pm$ 0.8         |                                    | 29.09     | 62.06      | 0.47 | 3.06                        | 0.73              |
|             | 15.2 $\pm$ 0.9         |                                    | 28.71     | 49.65      | 0.58 | 2.57                        | 0.70              |
|             | 18.4 $\pm$ 1.7         |                                    | 16.88     | 35.23      | 0.48 | 1.92                        | 0.69              |
|             | 19.9 $\pm$ 1.5         |                                    | 33.47     | 58.90      | 0.57 | 3.55                        | 0.63              |
| <b>ER13</b> | 16.3 $\pm$ 1.7         | <b>15.7 <math>\pm</math> 0.8</b>   | 43.37     | 91.54      | 0.47 | 3.50                        | 0.55              |
|             | 15.3 $\pm$ 1.0         |                                    | 23.59     | 48.56      | 0.49 | 2.21                        | 0.69              |
|             | 16.3 $\pm$ 1.5         |                                    | 34.39     | 58.33      | 0.59 | 2.90                        | 0.62              |

\* Pre-extensional paleodepth is measured as distance beneath the basal Tertiary tuffaceous sedimentary rocks in the East Range that dip 30° east and rest unconformably on Paleozoic and Mesozoic footwall rocks.

\*\* F<sub>t</sub> alpha-ejection correction calculation after Farley 2002
